# Supplementary material for: The postsynaptic t-SNARE Syntaxin 4 controls traffic of Neuroligin 1 and Synaptotagmin 4 to regulate retrograde signaling
Source: eLife. 2016 May 25;5:e13881. doi: 10.7554/eLife.13881 (PMC4880446; doi:10.7554/eLife.13881)
Supplement: Supplementary file 1. — Each carries a UAS-RNAi to knock down the gene product (indicated with CG and gene symbol). RNAi stock ID refers to the unique ID from either the TRiP center at Harvard Medical School or the Vienna Drosophila Resource Center. DOI: http://dx.doi.org/10.7554/eLife.13881.024 [file elife-13881-supp1.xlsx]

## Sheet: Sheet1
Supplementary file 1. Candidate list for RNAi screen
Complete list of transgenic lines tested. Each carries a UAS-RNAi to knock down the gene product.
RNAi stock ID refers to the unique ID from either the TRIP center at Harvard Medical School or
the Vienna Drosophila Resource Center.
CG	Gene name	RNAi construct ID
CG31136	Syx1A	JF01829
CG11173	usnp	JF01883
CG1467	Syx16	JF01924
CG7452	Syx17	JF01937
CG4109	Syx8	JF02038
CG13626	Syx18	JF02263
CG40452	SNAP25	JF02615
CG7736	Syx6	JF03125
CG9474	SNAP24	JF03146
CG4214	Syx5	JF03330
CG5081	Syx7	JF02436
CG2715	Syx4	JF01714
CG2715	Syx4	JF01460
CG17248	n-Syb	JF03417
CG13626	Syx18	Vienna 1209
CG14084	Bet1	Vienna 8420
CG1515	Ykt6	Vienna 105648
CG1515	Ykt6	Vienna 19329
CG17248	n-Syb	Vienna 49202
CG17248	n-Syb	Vienna 44011
CG17248	n-Syb	Vienna 49201
CG12210	c-Syb	Vienna 30605
CG12210	c-Syb	Vienna 39770
CG2715	Syx4	Vienna 32413
CG31136	Syx1A	Vienna 33112
CG31136	Syx1A	Vienna 3313
CG31136	Syx1A	Vienna 38399
CG3139	Syt1	Vienna 8874
CG4109	Syx8	Vienna 42561
CG4109	Syx8	Vienna 42562
CG4109	Syx8	Vienna 47154
CG11278	Syx13	Vienna 102432
CG11278	Syx13	Vienna 8361
CG4214	Syx5	Vienna 3857
CG4214	Syx5	Vienna 3859
CG5081	Syx7	Vienna 5413
CG7452	Syx17	Vienna 36596
CG7736	Syx6	Vienna 1578
CG7736	Syx6	Vienna 1579
CG7736	Syx6	Vienna 1501
CG8666	Tsp39D	JF01847
CG3530	CG3530	JF01885
CG1099	Dap160	JF01918
CG17137	Porin2	JF01927
CG42344	brp	JF01932
CG7765	Khc	JF01939
CG3725	Ca-P60A	JF01948
CG9842	Pp2B-14D	JF01949
CG2902	Nmdar1	JF01961
CG11556	Rabphilin	JF01970
CG12156	Rab39	JF01973
CG1782	Uba1	JF01977
CG33513	Nmdar2	JF02044
CG11895	stan	JF02047
CG1200	Aplip1	JF02049
CG15899	Ca-α1T	JF02150
CG12015	RabX6	JF02050
CG14750	Vps25	JF02055
CG17060	Rab10	JF02058
CG1709	Vha100	JF02059
CG17528	CG17528	JF02061
CG3849	Lasp	JF02075
CG1495	CamKI	JF02268
CG10047	Syt4	JF02272
CG4560	Arpc3A	JF02370
CG5915	Rab7	JF02377
CG11324	Homer	JF02584
CG2374	lbm	JF02589
CG2381	Syt7	JF02590
CG30483	Prosap	JF02596
CG3020	Sytbeta	JF02593
CG33094	Synd	JF02607
CG3320	Rab1	JF02609
CG33547	Rim	JF02610
CG3985	Syn	JF02613
CG4422	Gdi	JF02617
CG5014	Vap-33-1	JF02621
CG5341	Sec6	JF02623
CG6056	AP-2σ	JF02631
CG6159	Sec10	JF02633
CG6521	STAM	JF02637
CG6562	Synj	JF02639
CG6601	Rab6	JF02640
CG6622	Pkc53E	JF02641
CG6948	Clc	JF02646
CG6992	GluRIIA	JF02647
CG7034	Sec15	JF02649
CG7037	Cbl	JF02650
CG7100	CadN	JF02653
CG8287	Rab8	JF02669
CG8532	lqf	JF02672
CG8843	Sec5	JF02676
CG8936	Arpc3B	JF02679
CG9012	Chc	JF02681
CG9113	AP-1γ	JF02684
CG9388	AP-47	JF02685
CG9834	endoB	JF02688
CG9887	VGlut	JF02689
CG9623	if	JF02695
CG10923	Klp67A	JF02701
CG6757	SH3PX1	JF02730
CG3129	Rab18	JF02744
CG14296	endoA	JF02758
CG3210	Drp1	JF02762
CG33101	Nsf2	JF02765
CG3690	CG3690	JF02768
CG6498	CG6498	JF02778
CG9901	Arp14D	JF02785
CG1403	Sep1	JF02789
CG8705	Pnut	JF02792
CG5771	Rab11	JF02812
CG18214	trio	JF02815
CG1560	mys	JF02819
CG8024	Rab32	JF02836
CG4173	Sep2	JF02838
CG17941	ds	JF02842
CG2204	G-oalpha47A	JF02844
CG2108	Rab23	JF02859
CG31272	CG31272	JF02865
CG3870	RabX1	JF02868
CG7057	AP-50	JF02875
CG7127	Exo70	JF02876
CG7980	RabX5	JF02880
CG8604	Amph	JF02883
CG3612	blw	JF02896
CG5670	ATPalpha	JF02910
CG6851	Mtch	JF02924
CG5685	Calx	JF02937
CG10763	Gbeta5	JF02941
CG17870	14-3-3-zeta	JF02962
CG12532	BAP	JF02963
CG32688	Hk	JF02965
CG13772	neuroligin	JF02966
CG18076	shot	JF02971
CG9575	Rab35	JF02978
CG32451	SPoCk	JF02988
CG2520	lap	JF02994
CG31103	CG31103	JF02995
CG9778	Syt14	JF03001
CG15072	CG15072	JF03002
CG10229	katanin-60	JF03012
CG13777	Milt	JF03022
CG10617	Syt12	JF03128
CG18102	shi	JF03133
CG4591	Tsp86D	HM05001
CG15744	CG15744	HM05002
CG1768	dia	HM05027
CG8269	Dmn	HM05084
CG1762	betaInt-nu	HM05089
CG2146	didum	JF03035
CG31646	CG31646	JF03069
CG9261	nrv2	JF03081
CG3269	Rab2	JF03117
CG13638	RabX4	JF03121
CG3988	gammaSNAP	JF03124
CG4212	Rab14	JF03135
CG4264	Hsc70	JF03136
CG6095	Exo84	JF03139
CG6127	ser	JF03140
CG7234	GluRIIB	JF03145
CG1634	Nrg	JF03151
CG9704	Nrt	JF03170
CG6625	Snap	JF03266
CG7507	Dhc64C	JF03177
CG1528	gammaCop	HM05099
CG31057	tau	HM05101
CG6343	ND42	HM05104
CG10718	neb	HM05107
CG1084	Cont	HM05134
CG15811	Rop	HM05140
CG11949	Cora	HM05144
CG6831	Talin	HM05161
CG2903	Hrs	HM05175
CG16983	skpA	HM05185
CG3665	Fas2	JF02918
CG3168	CG3168	JF02441
CG5559	Sytalpha	JF02448
CG34392	Epac	JF02476
CG9139	CG9139	JF02521
CG15669	MESK2	JF03312
CG18069	CamkII	JF03336
CG40304	Rab21	JF03338
CG7293	Klp68D	JF03346
CG1732	CG1732	JF03358
CG42734	Ank2	JF03374
CG33950	trol	JF03376
CG32666	CG32666	JF03385
CG7641	Nca	JF03398
CG2999	Unc-13	JF02440
CG42614	scrib	JF03229
CG3352	ft	JF03245
CG6647	Porin	JF03251
CG2835	Gsalpha-60A	JF03255
CG1900	Rab40	JF03258
CG31106	CG31106	JF03261
CG17800	Dscam	JF03307
CG18000	sw	HM05249
CG18408	CAP	HM05250
CG7524	Src64B	JF03234
CG3664	Rab5	JF03335
CG3620	norpA	JF01585
CG1651	Ank	JF01588
CG9699	Sep4	JF01592
CG9100	Rab30	JF01593
CG10540	cpa	JF01597
CG10060	G-ialpha65A	JF01608
CG10545	Gbeta13F	JF01609
CG34410	Rab26	JF01684
CG3620	norpA	JF01713
CG2916	Sep5	JF01771
CG9635	RhoGEF2	JF01747
CG33528	Vmat	JF01198
CG17759	Galpha49B	JF01209
CG3139	Syt1	JF01234
CG6395	Csp	JF01235
CG8743	trpml	JF01239
CG11579	Arm	JF01251
CG11579	Arm	JF01252
CG2621	sgg	JF01255
CG2621	sgg	JF01256
CG12559	rl	JF01366
CG8355	sli	JF01228
CG8355	sli	JF01229
CG1618	comt	JF01233
CG31196	14-3-3epsilon	HM04001
CG17870	14-3-3-zeta	HM04002
CG1915	sls	JF01098
CG1915	sls	JF01099
CG42314	PMCA	JF01145
CG6944	Lam	JF01389
CG10119	LamC	JF01406
CG17520	CkIIalpha	JF01436
CG1618	comt	JF01459
CG3139	Syt1	JF01461
CG6395	Csp	JF01462
CG8743	trpml	JF01466
CG9994	Rab9	JF01861
CG7576	Rab3	JF02020
CG12532	BAP	HM04014
CG31814	CG31814	HM04050
CG6842	Vps4	HM04061
CG6556	cnk	HM04070
CG1411	CRMP	HM05269
CG14791	Rab27	JF02165
CG15221	CG15221	JF02166
CG16778	CG16778	JF02205
CG2331	TER94	JF03402
CG17762	Tomosyn	JF03414
CG33653	Caps	JF03418
CG14691	CG14691	JF03420
CG10082	CG10082	HMS00427
CG10082	CG10082	HMS00598
CG1081	Rheb	HMS00923
CG1084	Cont	HMS00186
CG10971	Hip1	HMS00508
CG11084	pk	HMS00408
CG11624	Ubi-p63e	HMS00284
CG1193	kat-60L1	HMS00510
CG12008	kst	HMS00882
CG12230	car	HMS00972
CG12306	polo	HMS00530
CG1242	Hsp83	HMS00796
CG1242	Hsp83	HMS00899
CG12559	rl	HMS00173
CG1458	CG1458	HMS01088
CG14713	CG14713	HMS00227
CG14816	PGam5	HMS00212
CG1560	mys	HMS00043
CG16778	CG16778	HMS01126
CG16983	skpA	HMS00657
CG16983	skpA	HMS00791
CG1725	dlg-1	JF02287
CG1725	dlg-1	HMS00024
CG1725	dlg-1	HMS00014
CG1768	dia	HMS00308
CG17759	Galpha49B	JF02390
CG17759	Galpha49B	JF02464
CG17947	alpha-Cat	HMS00317
CG2204	G-oalpha47A	HMS01129
CG2331	TER94	HMS00656
CG2885	RabX2	HMS00351
CG2903	Hrs	HMS00840
CG2903	Hrs	HMS00841
CG3127	Pgk	HMS00030
CG3127	Pgk	HMS00031
CG31795	ia2	HMS00536
CG33484	zormin	HMS01014
CG33519	unc-89	HMS00963
CG3352	ft	HMS00932
CG33979	capt	HMS00810
CG3664	Rab5	HMS00147
CG3665	Fas2	HMS01098
CG3762	Vha68	HMS01056
CG4212	Rab14	HMS01130
CG4254	tsr	HMS00534
CG4260	alpha-Adaptin	HMS00653
CG4264	Hsc70	HMS00152
CG42734	Ank2	HMS00295
CG4376	Actn	HMS00193
CG4755	RhoGAP92B	HMS00268
CG4877	CG4877	HMS01012
CG4921	Rab4	HMS01100
CG5373	Pi3K59F	HMS00261
CG5433	Klc	HMS00883
CG5439	CG5439	HMS00914
CG5670	ATPalpha	HMS00047
CG5670	ATPalpha	HMS00703
CG6343	ND42	HMS00852
CG6343	ND42	HMS00798
CG6395	Csp	HMS00046
CG6556	cnk	HMS00238
CG6625	Snap	HMS00872
CG6831	Talin	HMS00856
CG6831	Talin	HMS00799
CG7062	Rab19	HMS00592
CG7558	Arp66B	HMS00711
CG7576	Rab3	HMS01131
CG8048	Vha44	HMS00821
CG8243	CG8243	HMS00876
CG8479	opa1-like	HMS00349
CG9191	Klp61F	HMS00552
CG9635	RhoGEF2	HMS01118
CG9746	ird1	HMS00908
CG9885	dpp	HMS00022
CG9885	dpp	JF02455
CG9885	dpp	JF02794
CG17299	SNF4Aγ	JF02060
CG8472	Cam	HMS01318
CG7359	Sec22	HMS01238
CG3539	Slh	HMS01323
CG9212	Nipsnap	HMS01232
CG32670	RabX3	HMS01364
CG13366	CG13366	HMS01133
CG5562	gbb	HMS01243
CG18347	CG18347	HMS01235
CG12101	Hsp60	HMS01209
CG7700	Gos28	HMS01203
CG1599	Ti-Vamp	Vienna 13317
CG32758	CG32758	HMS01669
CG3279	Vti1	HMS01727
CG9195	Scamp	HMS01728
CG8228	Vps45	HMS01696
CG8282	Snx6	HMS01729
CG10538	CdGAPr	HMS01730
CG15087	CG15087	HMS01731
CG2093	Vps13	HMS01715
CG8454	Vps16A	HMS01716
CG18112	Vps16B	HMS01732
CG9779	vps24	HMS01733
CG32315	dlt	HMS01697
CG6873	CG6873	HMS01670
CG5730	AnnIX	HMS01719
CG31708	CG31708	HMS01671
CG31694	CG31694	HMS01672
CG15014	CG15014	HMS01722
CG14010	CG14010	HMS01673
CG13830	CG13830	HMS01679
CG11739	CG11739	HMS01674
CG11320	CG11320	HMS01675
CG10083	CG10083	HMS01735
CG11278	Syx13	HMS01723
CG12210	Syb	HMS01678
CG10808	synaptogyrin	HMS01724
CG9325	hts	HMS01736
CG4898	Tm1	HMS01676
CG6213	Vha13	HMS01677
CG9258	nrv1	HMS01725
CG7156	CG7156	HMS01983
CG2185	elm	HMS02009
CG8739	stmA	HMS01982
CG9949	sina	HMS02008
CG17216	KP78b	HMS01981
CG9446	coro	HMS02007
CG5603	CYLD	HMS02006
CG31332	Unc-115b	HMS02005
CG32434	siz	HMS01980
CG9958	snapin	HMS02003
CG2718	Gs1	HMS02002
CG15081	l(2)03709	HMS02001
CG34387	futsch	HMS02000
CG3994	ZnT35C	HMS01969
CG11303	TM4SF	HMS01968
CG6323	Tsp97E	HMS01967
CG5492	Tsp74F	HMS01966
CG32136	Tsp68C	HMS01965
CG18817	Tsp42Ea	HMS01964
CG14936	Tsp33B	HMS01963
CG9496	Tsp29Fb	HMS01962
CG2097	Sym	HMS01961
CG12327	Best3	HMS01960
CG17785	Golgin84	HMS01959
CG32744	Ubi-p5E	HMS01881
CG7103	Pvf1	HMS01958
CG9819	CanA-14F	HMS01880
CG1088	Vha26	HMS01912
CG32791	CG32791	HMS01879
CG42247	DCX-EMAP	HMS01878
CG4764	CG4764	HMS01877
CG5658	Klp98A	HMS01957
CG1514	snz	HMS01956
CG1359	Bet5	HMS01909
CG6410	Snx16	HMS01908
CG5408	trbl	HMJ02089
CG4999	Tsp66E	HMS01585
CG8200	Flo-1	HMS01589
CG9749	Abi	HMS01597
CG15792	zip	HMS01618
CG8183	Khc-73	HMS01624
CG4999	Tsp66E	HMS01632
CG7540	M6	HMS01645
CG8222	Pvr	HMS01662
CG3305	Lamp1	HMS01698
CG15792	zip	HMS01703
CG34127	CG34127	HMS01709
CG34139	CG34139	HMS01710
CG3326	CG3326	HMS01711
CG3338	CG3338	HMS01712
CG7371	CG7371	HMS01713
CG9807	Rab9Db	HMS01714
CG8029	VhaAC45	HMS01717
CG42368	CG42368	HMS01718
CG9579	AnnX	HMS01720
CG3121	CG3121	HMS01721
CG10711	Vps36	HMS01739
CG4893	CG4893	HMS01740
CG5870	beta-Spec	HMS01746
CG6637	lsn	HMS01747
CG1599	CG1599	HMS01762
CG2774	Snx1	HMS01763
CG3911	Bet3	HMS01764
CG9298	Trs23	HMS01765
CG17828	mod(r)	HMS01766
CG8055	shrb	HMS01767
CG9712	TSG101	HMS01768
CG14804	Vps26	HMS01769
CG7565	CG7565	HMS01770
CG5802	CG5802	HMS01771
CG30120	CG30120	HMS01772
CG5026	CG5026	HMS01773
CG42343	CG42343	HMS01774
CG9968	Anxb11	HMS01775
CG31860	CG31860	HMS01776
